# Supplementary material for: Scalable perovskite/CIGS thin-film solar module with power conversion efficiency of 17.8%
Source: Royal Society of Chemistry journal article supplement (doi:10.1039/c7ta01651d), 2017-01-01
Supplement: c7ta01651d1.pdf [file c7ta01651d1.pdf]

## Supplementary information

### Fully Scalable Perovskite/CIGS Thin-Film Solar Module with Power Conversion Efficiency of 17.8%

U. W. Paetzold<sup>1,2,4\*</sup>, M. Jaysankar<sup>1,5</sup>, R. Gehlhaar<sup>1</sup>, W. Qiu<sup>1</sup>, J. Bastos<sup>1</sup>, L. Rakocevic<sup>1,5</sup>, E. Ahlswede<sup>3</sup>, S. Paetel<sup>3</sup>, B.S. Richards<sup>2,4</sup>, T. Aernouts<sup>1</sup>, M. Powalla<sup>3,4</sup>, J. Poortmans<sup>1,5,6</sup>

<sup>1</sup> imec v.z.w., Kapeldreef 75, 3001 Leuven, Belgium

<sup>2</sup> Karlsruhe Institute of Technology, Institute of Microstructure Technology, Eggenstein-Leopoldshafen, 76344, Germany

<sup>3</sup> Zentrum für Sonnenenergie- und Wasserstoff-Forschung Baden-Württemberg (ZSW), Industriestr. 6, 70565 Stuttgart, Germany

<sup>4</sup> Karlsruhe Institute of Technology, Light Technology Institute, Engesserstraße 13, 76131 Karlsruhe, Germany

<sup>5</sup> Katholieke Universiteit Leuven, ESAT-Electa, Kardinaal Mercierlaan, 3001 Leuven, Belgium

<sup>6</sup> Hasselt University, Wetenschapspark 1, 3590 Diepenbeek, Belgium

\*Corresponding author: Dr. Ulrich W. Paetzold, ulrich.paetzold@kit.edu

---

#### Spectral response of the subcells in 4T configuration:

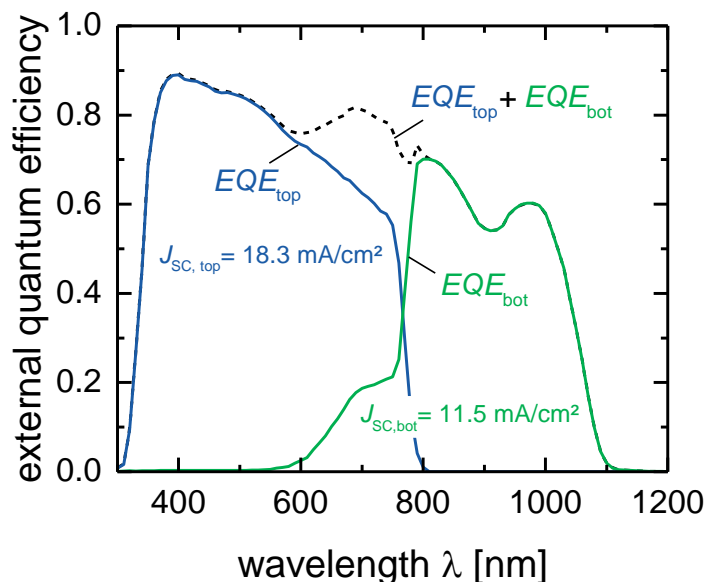

**Figure S1:** External quantum efficiency spectra of a small-area semi-transparent  $\text{CH}_3\text{NH}_3\text{PbI}_3$  solar cell and the CIGS bottom solar cell measured in 4T configuration.

**Histogram of the aperture efficiency of semitransparent perovskite solar modules:**

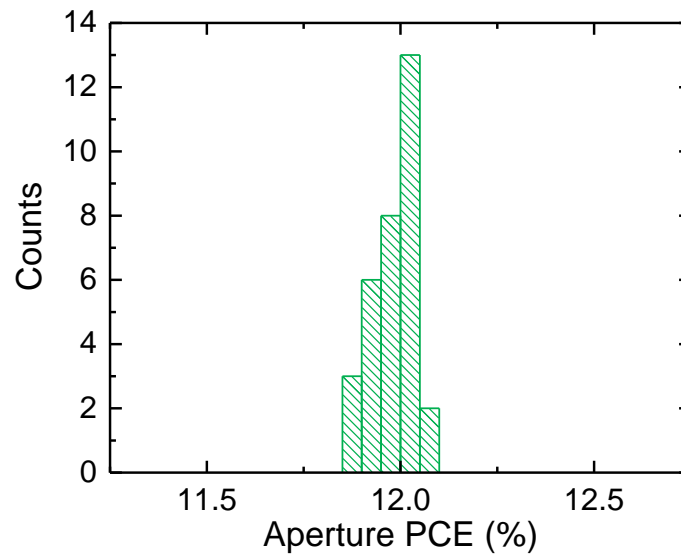

**Figure S2:** Histogram showing the aperture power conversion efficiencies (*PCE*) of 32 semitransparent perovskite solar modules that were fabricated in the same run. Those modules that showed obvious production related failures like shunted cell stripes and false interconnection were removed from the statistics.

**Influence of the radiative luminescence of the perovskite top solar module on the performance of CIGS bottom solar module**

| Configuration of semitransparent perovskite top solar module | Parameters of the CIGS bottom solar module |           |                       |                       |            |
|--------------------------------------------------------------|--------------------------------------------|-----------|-----------------------|-----------------------|------------|
|                                                              | <i>Area</i>                                | <i>FF</i> | <i>I<sub>sc</sub></i> | <i>V<sub>oc</sub></i> | <i>PCE</i> |
| Short circuit                                                | 3.76 cm <sup>2</sup>                       | 75,7 %    | 11.2 mA               | 2.576 V               | 5.7        |
| Open circuit                                                 | 3.76 cm <sup>2</sup>                       | 75,5 %    | 11.0 mA               | 2.578 V               | 5.8        |

**Table T1:** Influence of the radiative luminescence of the perovskite top solar module on the performance of CIGS bottom solar module.

**Solar Cell and Solar Module Parameters used for the loss analyses (i.e. Figure 4)**

|                                                                 | IV sweep direction | Parameters of the Perovskite top solar module |            |                               |               |                        |               |
|-----------------------------------------------------------------|--------------------|-----------------------------------------------|------------|-------------------------------|---------------|------------------------|---------------|
|                                                                 |                    | Area                                          | FF         | $I_{sc}$                      | $V_{oc}$      | $V_{oc}/\#_{subcells}$ | PCE           |
| Semi-transparent perovskite top solar module in 4T architecture | <b>Voc → Jsc</b>   | 4.0 cm <sup>2</sup>                           | <b>73%</b> | <b>10.3 mA</b>                | <b>6.41 V</b> | 0.916 V                | <b>12.0 %</b> |
|                                                                 | Jsc → Voc          |                                               | 72%        | 10.3 mA                       | 6.36 V        | 0.918 V                | 11.8 %        |
| Opaque perovskite solar module                                  | <b>Voc → Jsc</b>   | 4.0 cm <sup>2</sup>                           | <b>79%</b> | <b>19.8 mA/cm<sup>2</sup></b> | <b>3.90 V</b> | 0.975 V                | <b>15.7 %</b> |
|                                                                 | Jsc → Voc          |                                               | 77%        | 19.8 mA/cm <sup>2</sup>       | 3.90 V        | 0.975 V                | 14.8 %        |
| Perovskite solar cell                                           | <b>Voc → Jsc</b>   | 0.13 cm <sup>2</sup>                          | <b>77%</b> | <b>22.0 mA/cm<sup>2</sup></b> | <b>0.97 V</b> | n.a.                   | <b>16.4 %</b> |
|                                                                 | Jsc → Voc          |                                               | 76%        | 22.0 mA/cm <sup>2</sup>       | 0.95 V        |                        | 15.9 %        |

**Table T2:** Photovoltaic device parameters of semi-transparent and opaque perovskite solar modules compared to small scale reference perovskite solar cell. The number in bold are used for the loss analyses in Figure 4.

|                             | Parameters of the CIGS bottom solar module |             |                |                |                        |               |
|-----------------------------|--------------------------------------------|-------------|----------------|----------------|------------------------|---------------|
|                             | Area                                       | FF          | $I_{sc}$       | $V_{oc}$       | $V_{oc}/\#_{subcells}$ | PCE           |
| CIGS bottom solar module    | <b>3.76 cm<sup>2</sup></b>                 | <b>75 %</b> | <b>11.2 mA</b> | <b>2.58 V</b>  | 0.645 V                | <b>5.8 %</b>  |
| CIGS reference solar module | <b>3.76 cm<sup>2</sup></b>                 | <b>75 %</b> | <b>29.2 mA</b> | <b>2.70 V</b>  | 0.675 V                | <b>15.7 %</b> |
| CIGS solar cell             | <b>0.25 cm<sup>2</sup></b>                 | <b>76 %</b> | <b>32.1 mA</b> | <b>0.680 V</b> | n.A.                   | <b>16.6 %</b> |

**Table T3:** Photovoltaic device parameters of the reference CIGS solar cell, the plain reference CIGS solar module and the CIGS bottom solar module in 4T configuration, placed below a semi-transparent perovskite semi-transparent perovskite solar module.

**Performance of Solar Cells processed on ebeam evaporated TiO<sub>2</sub> layers of different thicknesses:**

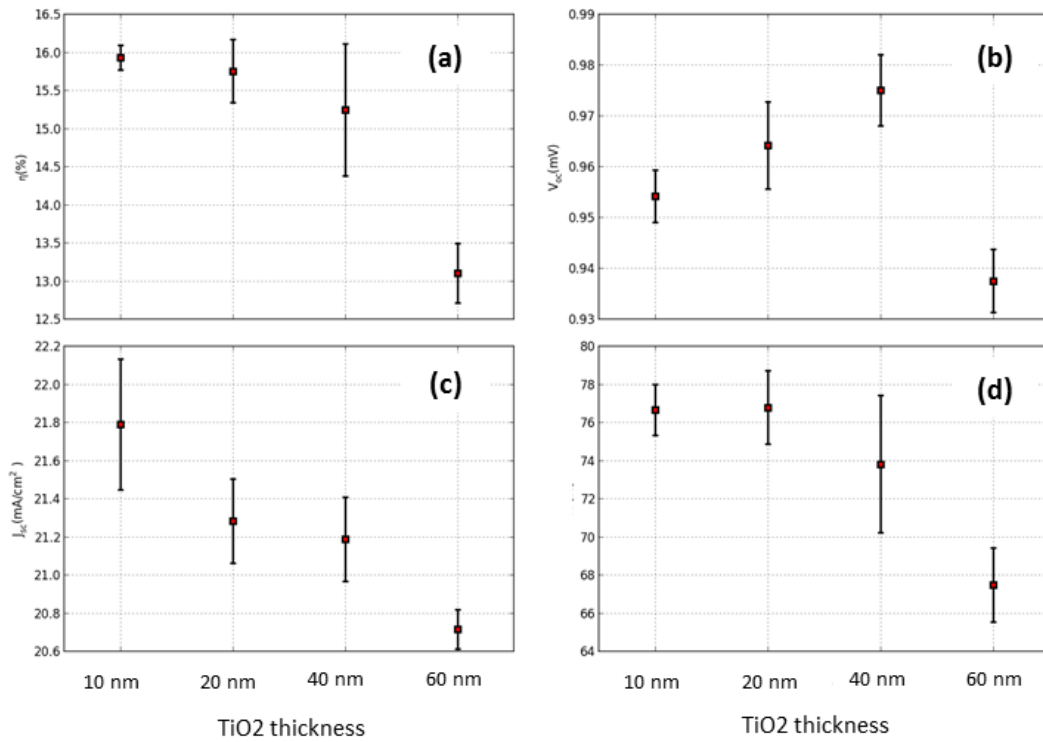

**Figure S2:** Solar cell characteristics of perovskite solar cells processed on ebeam evaporated TiO<sub>2</sub> layers of different thicknesses. The recipe is identical to the one used in the manuscript to fabricate the semi-transparent perovskite solar modules. The power conversion efficiency (a), the open-circuit voltage (b), the short-circuit current density (c), and the fill factor (d) are shown.
